# Supplementary material for: Quality of diabetes care worldwide and feasibility of implementation of the Alphabet Strategy: GAIA project (Global Alphabet Strategy Implementation Audit)
Source: BMC Health Serv Res. 2014 Oct 11;14:467. doi: 10.1186/1472-6963-14-467 (PMC4283094; doi:10.1186/1472-6963-14-467)
Supplement: Supplementary file 1 — Additional file 1: Alphabet Strategy questionnaire. (PDF 71 KB) [file 12913_2013_3553_MOESM1_ESM.pdf]

# **Alphabet Strategy Questionnaire**

Minimum of 5 per team including 2 patients and 3 healthcare professionals. Ideally fill 7

Please indicate your response along the bold line with a vertical mark.

1.

|                                                             |                |
|-------------------------------------------------------------|----------------|
| <b>What do you think of the Alphabet Strategy approach?</b> |                |
| Strongly Disagree                                           | Strongly Agree |
| <div><div></div></div>                                      |                |

2.

|                                                                         |                |
|-------------------------------------------------------------------------|----------------|
| <b>Are you likely to adopt this strategy in your clinical practice?</b> |                |
| Strongly Disagree                                                       | Strongly Agree |
| <div><div></div></div>                                                  |                |

3.

|                                                                                                                 |                |
|-----------------------------------------------------------------------------------------------------------------|----------------|
| <b>Do you think your patients would understand and benefit from the educational potential of this strategy?</b> |                |
| Strongly Disagree                                                                                               | Strongly Agree |
| <div><div></div></div>                                                                                          |                |

4.

|                                                                     |                |
|---------------------------------------------------------------------|----------------|
| <b>Do you think this will improve the outcome of your practice?</b> |                |
| Strongly Disagree                                                   | Strongly Agree |
| <div><div></div></div>                                              |                |

5.

|                                                                          |                |
|--------------------------------------------------------------------------|----------------|
| <b>Do you think this strategy can apply to your economic background?</b> |                |
| Strongly Disagree                                                        | Strongly Agree |
| <div><div></div></div>                                                   |                |

6.

|                                                                                  |                |
|----------------------------------------------------------------------------------|----------------|
| <b>Do you think this strategy needs to be translated in your local language?</b> |                |
| Strongly Disagree                                                                | Strongly Agree |
| <div><div></div></div>                                                           |                |

7.

|                                                                              |                |
|------------------------------------------------------------------------------|----------------|
| <b>Do you think the English version will be more useful in your clinics?</b> |                |
| Strongly Disagree                                                            | Strongly Agree |
| <div><div></div></div>                                                       |                |

8.

| What do you think of the Diabetes Care Plan?                                       |             |
|------------------------------------------------------------------------------------|-------------|
| Not Useful                                                                         | Very useful |
| 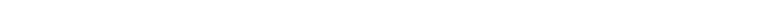 |             |

9.

| What do you think of the educational posters?                                      |             |
|------------------------------------------------------------------------------------|-------------|
| Not Useful                                                                         | Very useful |
|  |             |

10.

|                                                 |                             |
|-------------------------------------------------|-----------------------------|
| <b>Do you think this strategy is practical?</b> |                             |
| Yes <input type="checkbox"/>                    | No <input type="checkbox"/> |

---

11.

|                                               |                             |
|-----------------------------------------------|-----------------------------|
| Do you think this strategy is evidence based? |                             |
| Yes <input type="checkbox"/>                  | No <input type="checkbox"/> |

12.

| <b>Which health care professional can adopt this strategy (✓ for yes, X for no)</b> |                    |                |                   |                         |                   |
|-------------------------------------------------------------------------------------|--------------------|----------------|-------------------|-------------------------|-------------------|
| GP<br><br>□                                                                         | Dietitian<br><br>□ | Nurse<br><br>□ | Surgeons<br><br>□ | Administrators<br><br>□ | Patients<br><br>□ |

---

13.

**Please enter at least 3 comments you may have regarding the following questions**

---

13 A.

[illegible]

13 B.

**How could this strategy be implemented?**

- 
- 
- 
- 
- 
- 
- 
-
